# Supplementary material
Source: PubMed Central journal article supplement (PMC6201274)
Supplement: NIHMS980544-supplement-1.pdf [file NIHMS980544-supplement-1.pdf]

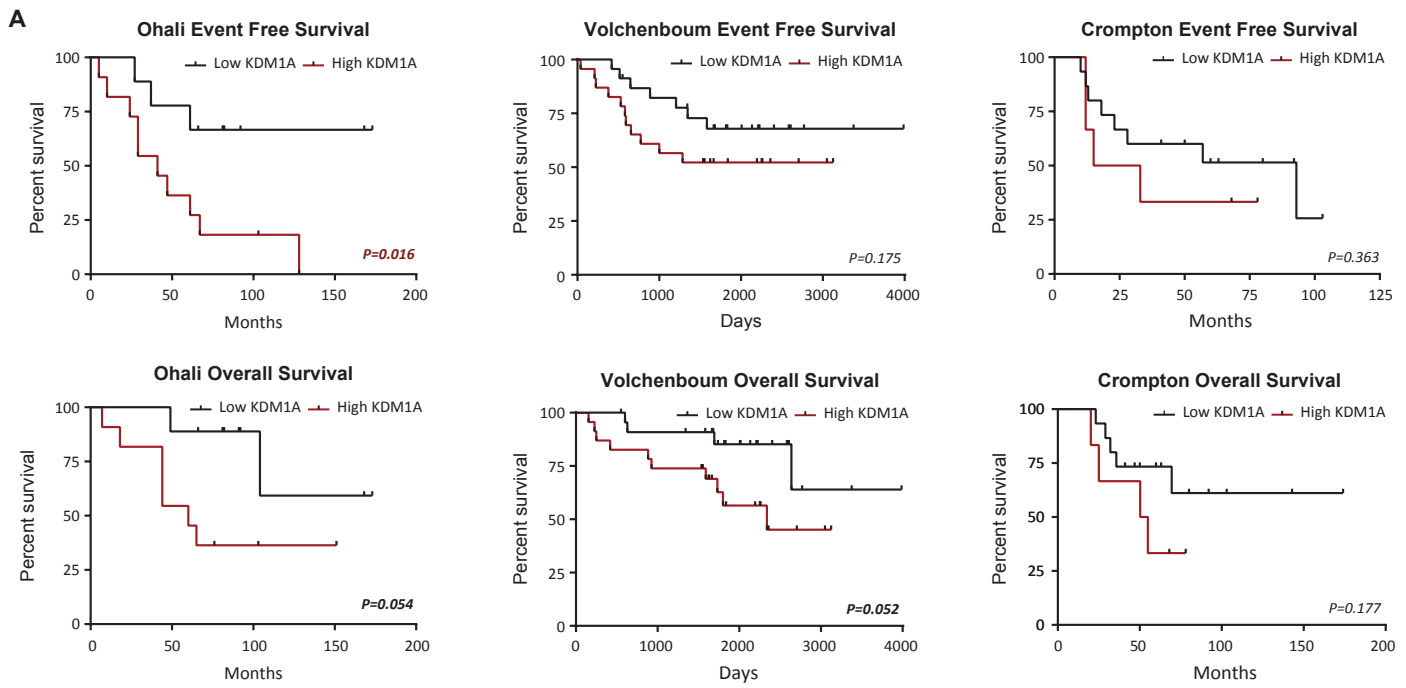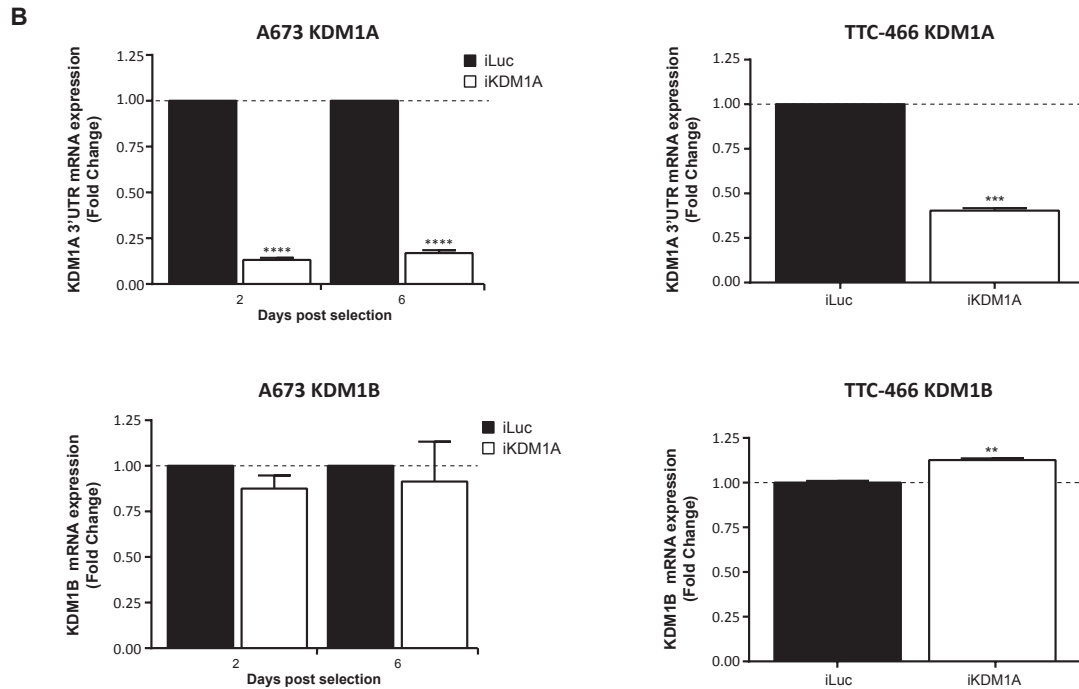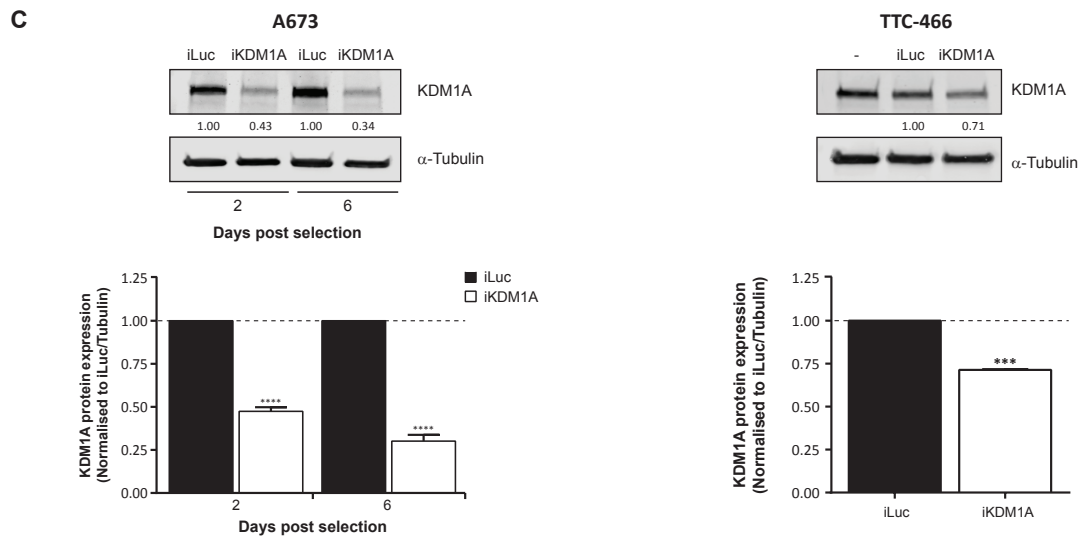

**Supplementary Figure S1:** *Knockdown of KDM1A significantly impairs the proliferative and tumorigenic properties of Ewing sarcoma cells.*

**(A)** Kaplan-Meier survival curves of Ewing sarcoma patients stratified by high and low KDM1A expression. Expression data obtained from Ohali et al., 2004, Crompton et al., 2014 and Schafer et al., 2008. **(B)** Relative mRNA expression levels of KDM1A and KDM1B in A673 and TTC-466 cells stably transduced with iKDM1A or iLuc control shRNA constructs following Puromycin selection. **(C)** Representative image of KDM1A protein levels from cells treated as in **(B)**. Quantification of protein levels (densitometry) following KDM1A knockdown also depicted. Protein normalized to  $\alpha$ -Tubulin (loading control) and iLuc control. Data represents mean  $\pm$  SEM from three independent experiments for A673 cells and mean  $\pm$  STDEV from two independent experiments for TTC-466 cells. Asterisks denote statistical significance ( \*\* $P$ <0.01, \*\*\* $P$ <0.001, \*\*\*\* $P$ <0.0001).
