# Supplementary material
Source: PubMed Central journal article supplement (PMC6201274)
Supplement: NIHMS980544-supplement-2.pdf [file NIHMS980544-supplement-2.pdf]

A

## A673

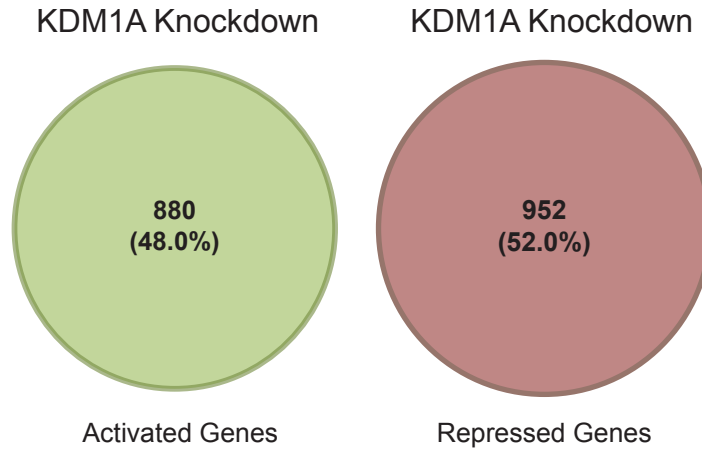

### KDM1A Repressed Genes: Activated genes upon KDM1A Knockdown, (n=880)

| Rank | Canonical Pathway                                 | P-Value                | Pathway Overlap | Genes                                                                                                                                                              |
|------|---------------------------------------------------|------------------------|-----------------|--------------------------------------------------------------------------------------------------------------------------------------------------------------------|
| 1    | Hepatic Fibrosis/Hepatic Stellate Cell Activation | 7.51x10 <sup>-09</sup> | 25/181 (13.8%)  | A2M, CCL2, CCR7, COL24A1, COL5A3, COL6A5, CTGF, CXCL8, EDN1, ICAM1, IL6, IL1A, IL1B, IL1R1, IL6R, KDR, LAMA1, LY96, MMP1, NFKB1, NGFR, PDGFA, PDGFB, SERPINE1, TNF |
| 2    | Granulocyte Adhesion and Diapedesis,              | 2.50x10 <sup>-08</sup> | 23/165 (13.9%)  | CCL2, CCL20, CCL26, CLDN12, CX3CL1, CXCL1, CXCL2, CXCL8, HRH1, ICAM1, ICAM2, IL1A, IL1B, IL1R1, ITGA3, ITGAM, MMP1, MMP3, MMP7, MMP12, NGFR, SELE, TNF             |
| 3    | Agranulocyte Adhesion and Diapedesis              | 7.62x10 <sup>-08</sup> | 23/175 (13.1%)  | ACTG2, AOC3, CCL2, CCL20, CCL26, CLDN12, CX3CL1, CXCL1, CXCL2, CXCL8, HRH1, ICAM1, ICAM2, IL1, IL1B, IL1R1, ITAG3, MMP1, MMP3, MMP7, MMP12, SELE, TNF              |
| 4    | HMGB1 Signaling                                   | 2.17x10 <sup>-07</sup> | 19/131 (14.5%)  | CCL2, CNTF, CXCL8, ICAM1, IL6, IL11, IL1A, IL1B, IL1R1, LIF, MAP2K3, NFKB1, NGFR, PLAT, RHOJ, RND3, SELE, SERPINE1, TNF                                            |
| 5    | TREM1 Signaling                                   | 1.03x10 <sup>-06</sup> | 13/70 (18.6%)   | CCL2, CXCL8, ICAM1, IL6, IL1B, ITGAX, NFKB1, STAT3, STAT5A, TLR1, TLR6, TLR7, TNF                                                                                  |

### KDM1A Activated Genes: Repressed genes upon KDM1A Knockdown, (n=952)

| Rank | Canonical Pathway      | P-Value                | Pathway Overlap | Genes                                                                               |
|------|------------------------|------------------------|-----------------|-------------------------------------------------------------------------------------|
| 1    | Ethanol Degradation IV | 1.89x10 <sup>-09</sup> | 10/21 (47.6%)   | ACSS1, ACSS2, ALDH2, ALDH2, ALDH1A1, ALDH1A3, ALDH1L1, ALDH1L2, ALDH7A1, CYGB, GPX7 |
| 2    | Granzyme A Signaling   | 9.04x10 <sup>-08</sup> | 8/17 (47.1%)    | H1FO, HIST1H1A, HIST1H1B, HIST1H1C, HIST1H1D, HIST1H1E, HIST1H1T, HMGB2             |
| 3    | Oxidative Ethanol      | 9.04x10 <sup>-08</sup> | 8/17 (47.1%)    | ACSS1, ACSS2, ALDH2, ALDH1A1, ALDH1A3, ALDH1L1, ALDH1L2, ALDH7A1,                   |
| 4    | Dopamine Degradation   | 9.72x10 <sup>-07</sup> | 9/29 (31.0%)    | ALDH2, ALDH1A1, ALDH1A3, ALDH1L1, ALDH1L2, ALDH7A1, SULT1A1, SULT1B1, SULT1E1       |
| 5    | Histamine Degradation  | 1.26x10 <sup>-05</sup> | 6/15 (40.0%)    | ALDH2, ALDH1A1, ALDH1A3, ALDH1L1, ALDH1L2, ALDH7A1                                  |

**B**

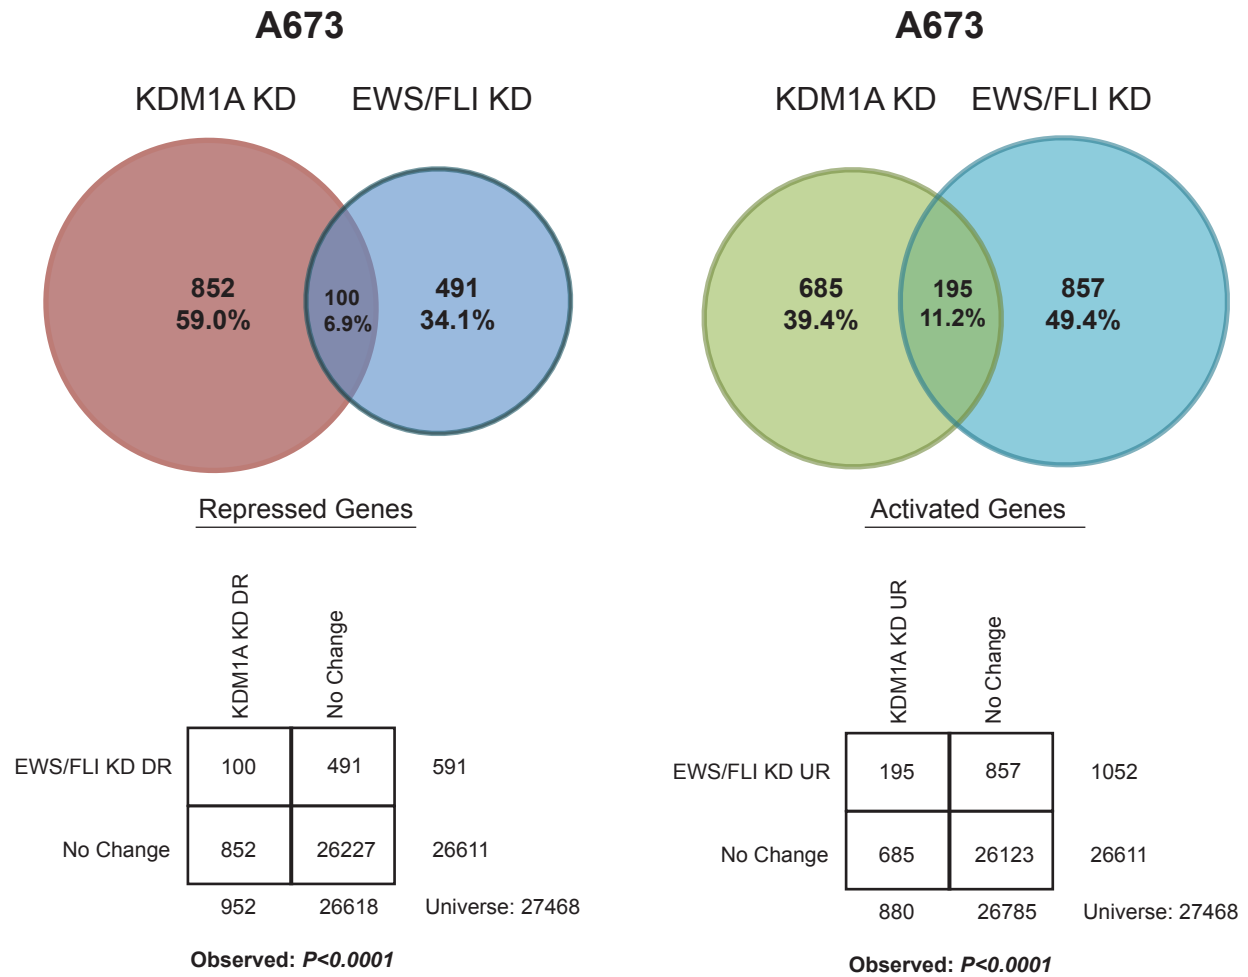

**C**

**KDM1A knockdown and EWS/FLI knockdown common repressed genes: Activated upon knockdown (n=195)**

| Rank | Canonical Pathway                                 | p-Value                | Pathway Overlap | Genes                                                                                                    |
|------|---------------------------------------------------|------------------------|-----------------|----------------------------------------------------------------------------------------------------------|
| 1    | Hepatic Fibrosis/Hepatic Stellate Cell Activation | $3.56 \times 10^{-11}$ | 16/181 (8.8%)   | A2M, CCL2, COL5A3, CTGF, CXCL8, EDN1, ICAM1, IL1A, IL1B, IL1R1, IL6R, KDR, LAMA1, PDGFA, PDGFB, SERPINE1 |
| 2    | HMGB1 Signaling                                   | $7.69 \times 10^{-8}$  | 11/131 (8.4%)   | CCL2, CXCL8, ICAM1, IL11, IL1B, IL1R1, LIF, PLAT, RND3, SERPINE1                                         |
| 3    | Atherosclerosis Signaling                         | $4.08 \times 10^{-6}$  | 9/124 (7.3%)    | CCL2, COL5A3, CXCL8, ICAM1, IL1A, IL1B, PDGFA, PDGFB, PLA2G4C                                            |
| 4    | Acute Phase Response Signaling                    | $7.02 \times 10^{-6}$  | 10/168 (6.0%)   | A2M, C1S, HMOX1, IL1A, IL1B, IL1R1, IL6R, SERPIND1, SERPINE1, SOCS3                                      |
| 5    | Coagulation System                                | $2.32 \times 10^{-5}$  | 5/35 (14.3%)    | A2M, PLAT, PLAU, SERPIND1, SERPINE1                                                                      |

**KDM1A knockdown and EWS/FLI knockdown common activated genes: Repressed upon knockdown (n=100)**

| Rank | Canonical Pathway    | P-Value               | Pathway Overlap | Genes            |
|------|----------------------|-----------------------|-----------------|------------------|
| 1    | Complement System    | $7.83 \times 10^{-4}$ | 3/36 (8.3%)     | C6, C7, ITGB2    |
| 2    | The Visual Cycle     | $4.06 \times 10^{-3}$ | 2/19 (10.5%)    | DHRS3, RBP1      |
| 3    | Dopamine Degradation | $9.32 \times 10^{-3}$ | 2/29 (6.9%)     | SULT1A1, SULT1E1 |

D

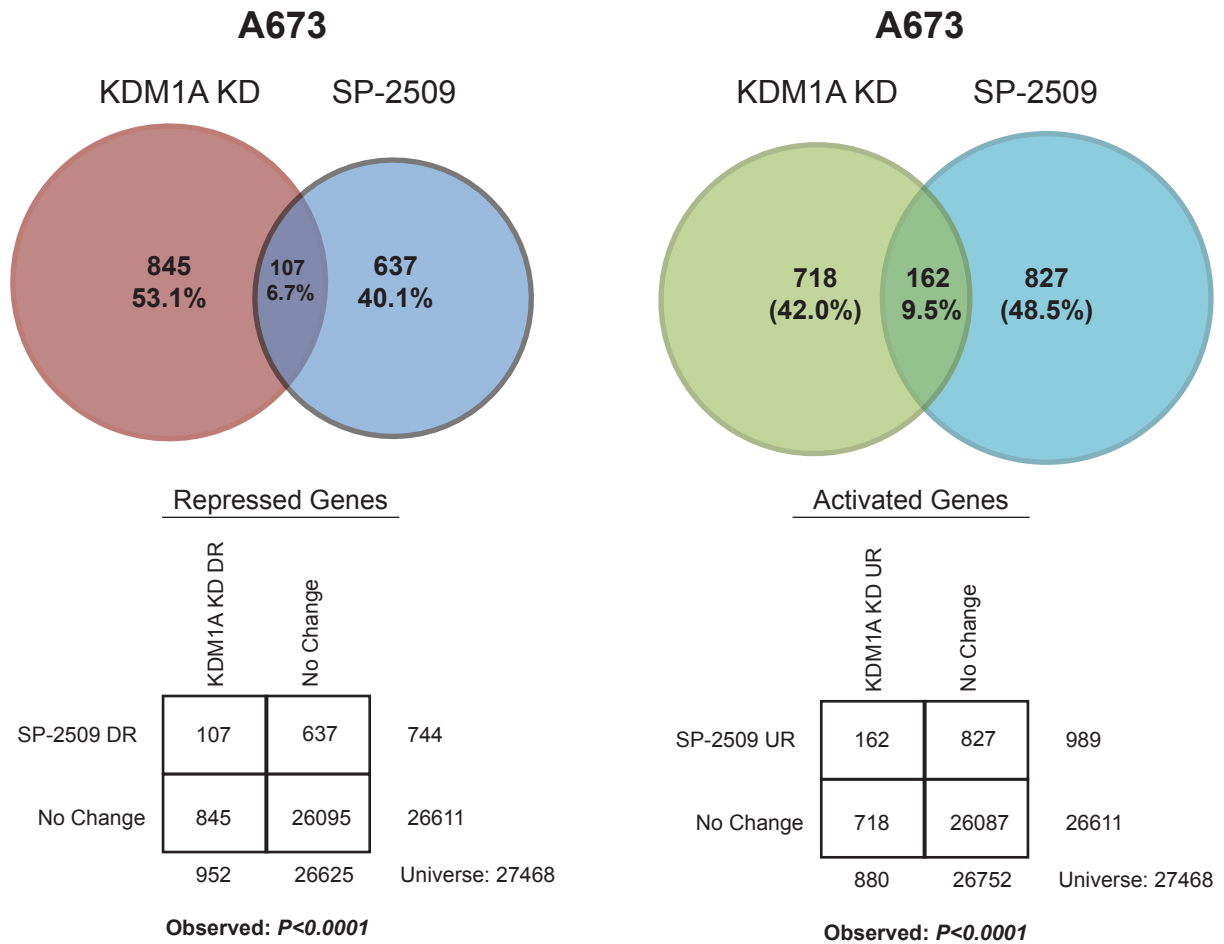

E

**SP-2509 and KDM1A Knockdown (KD) common repressed genes: Activated upon KD/drug treatment (n=162)**

| Rank | Canonical Pathway                                 | P-Value                | Pathway Overlap | Genes                                                              |
|------|---------------------------------------------------|------------------------|-----------------|--------------------------------------------------------------------|
| 1    | Granulocyte Adhesion and Diapedesis,              | $1.29 \times 10^{-06}$ | 10/165 (6.1%)   | CCL26, CXCL1, CXCL2, CXCL8, ICAM1, IL1A, IL1R1, ITGA3, ITGAM, MMP3 |
| 2    | Agranulocyte Adhesion and Diapedesis              | $2.20 \times 10^{-06}$ | 10/175 (5.7%)   | AOC3, CCL26, CXCL1, CXCL2, CXCL8, ICAM1, IL1A, IL1R1, ITGA3, MMP3  |
| 3    | HMGB1 Signaling                                   | $1.45 \times 10^{-05}$ | 8/131 (6.1%)    | CXCL8, ICAM1, IL11, IL1R1, LIF, RND3, SERPINE1                     |
| 4    | Hepatic Fibrosis/Hepatic Stellate Cell Activation | $1.44 \times 10^{-04}$ | 8/181 (4.4%)    | CTGF, CXCL8, ICAM1, IL1A, IL1R1, IL6R, PDGFA, SERPINE1             |
| 5    | IL-8 Signaling                                    | $1.44 \times 10^{-04}$ | 8/196 (4.1%)    | CXCL1, CXCL8, HBEGF, HMOX1, ICAM1, ITGAM, ITGAX, RND3              |

**SP-2509 and KDM1A Knockdown (KD) common activated genes: Repressed upon KD/drug treatment (n=107)**

| Rank | Canonical Pathway                                 | P-Value                | Pathway Overlap | Genes                      |
|------|---------------------------------------------------|------------------------|-----------------|----------------------------|
| 1    | Cell cycle: G2/M DNA Damage Checkpoint Regulation | $1.26 \times 10^{-04}$ | 4/49 (8.2%)     | AURKA, CDC25C, SKP2, TOP2A |
| 2    | Glycine Degradation (Creatine Biosynthesis)       | $1.05 \times 10^{-02}$ | 1/2 (50%)       | GAMT                       |
| 3    | Thiosulfate Disproportionation III (Rhodanese)    | $1.56 \times 10^{-02}$ | 1/3 (33.3%)     | TST                        |

**F**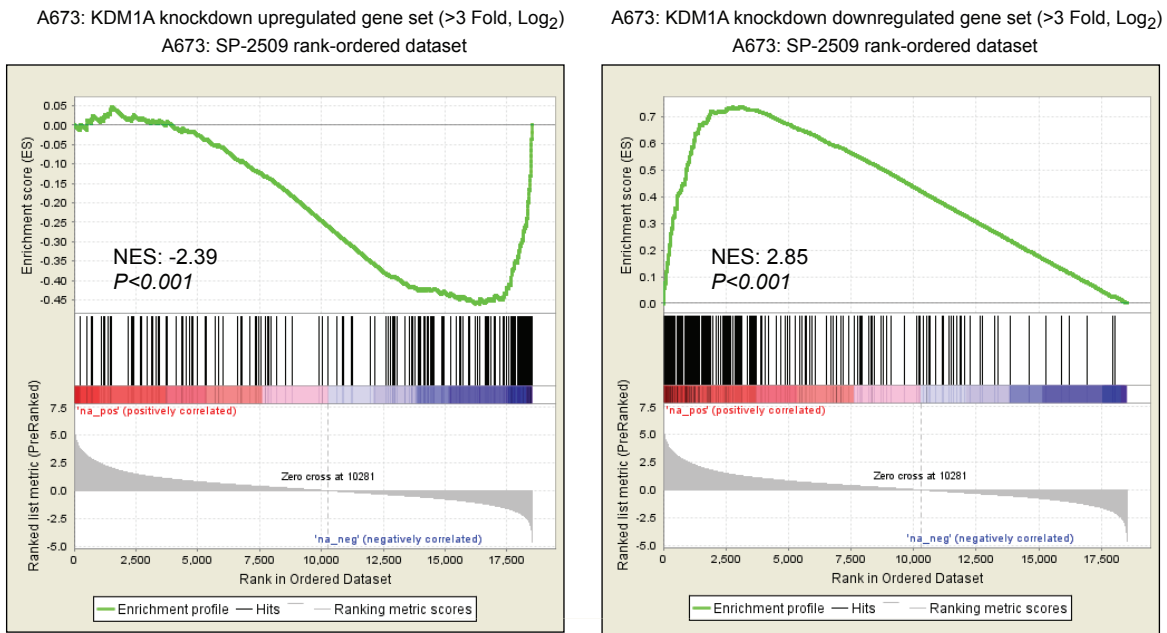

**Supplementary Figure S2: Targeted KDM1A inhibition and EWS/FLI knockdown induces similar transcriptional signatures**

(A) IPA of canonical pathways for genes commonly repressed and activated following KDM1A knockdown in A673 cells (>2 Log<sub>2</sub> fold change from iLuc scramble control). Venn diagram representations of the overlap between transcriptional profiles of (B) EWS/FLI and KDM1A knockdown or (D) KDM1A knockdown and SP-2509 treatment in A673 cells, generated through RNA-seq. Chi-square determined *P*-values are indicated with the observed contingency tables shown. IPA analysis of canonical pathways for genes commonly repressed and activated following (C) EWS/FLI and KDM1A knockdown or (E) KDM1A knockdown and SP-2509 treatment. (F) GSEA from RNA-seq experiments comparing SP-2509 treatment (rank-ordered dataset) and KDM1A knockdown in A673 cells. Normalized enrichment scores (NES) and *P* values are shown.
