# Supplementary material
Source: PubMed Central journal article supplement (PMC6201274)
Supplement: NIHMS980544-supplement-3.pdf [file NIHMS980544-supplement-3.pdf]

**A**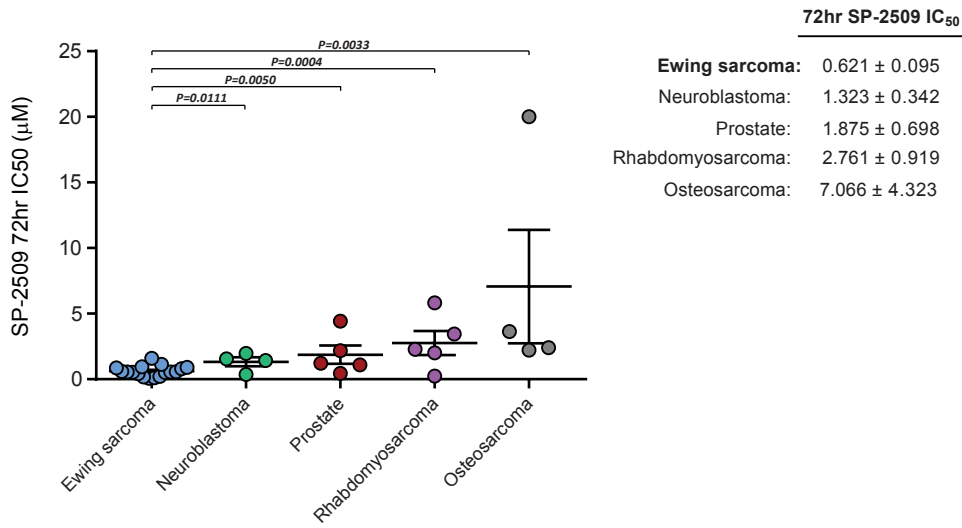**B**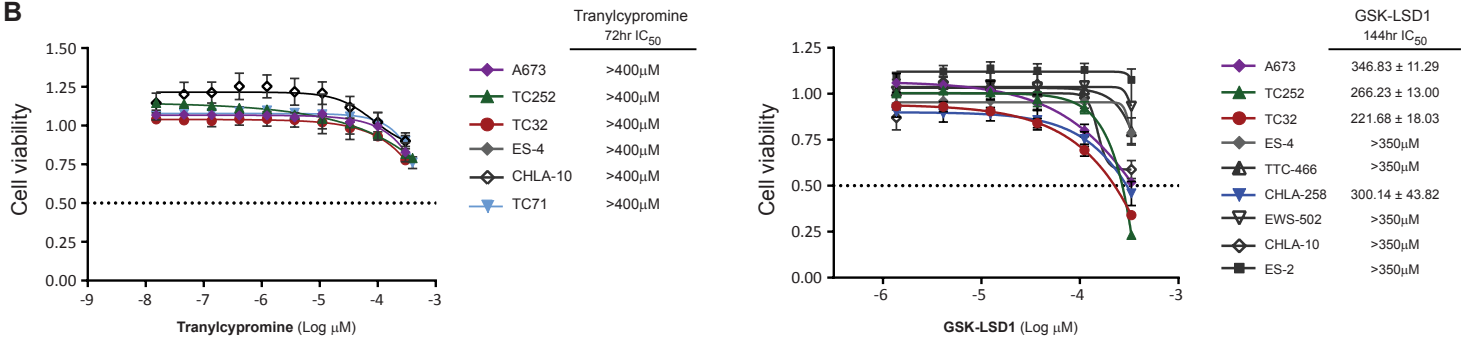**C**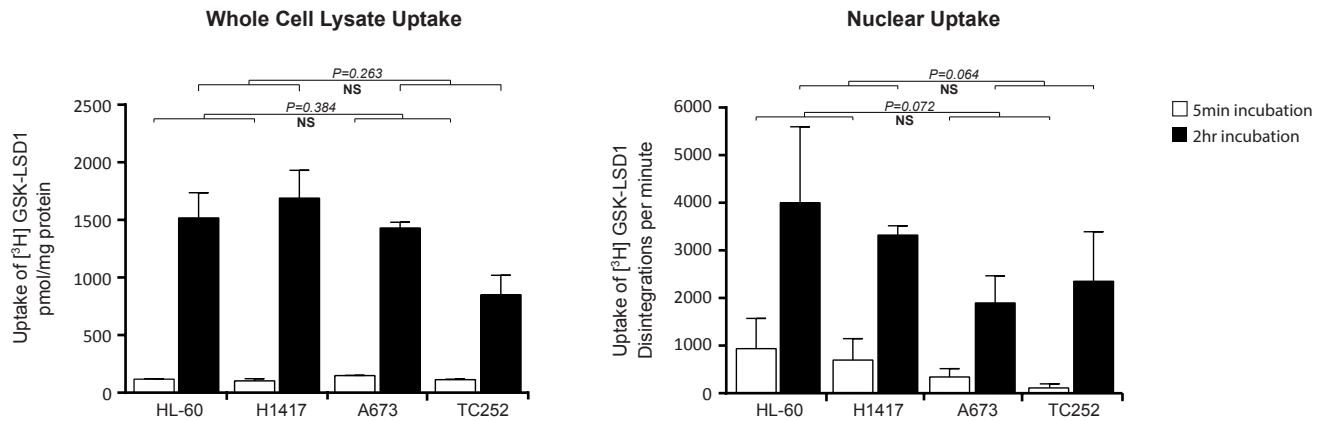**D**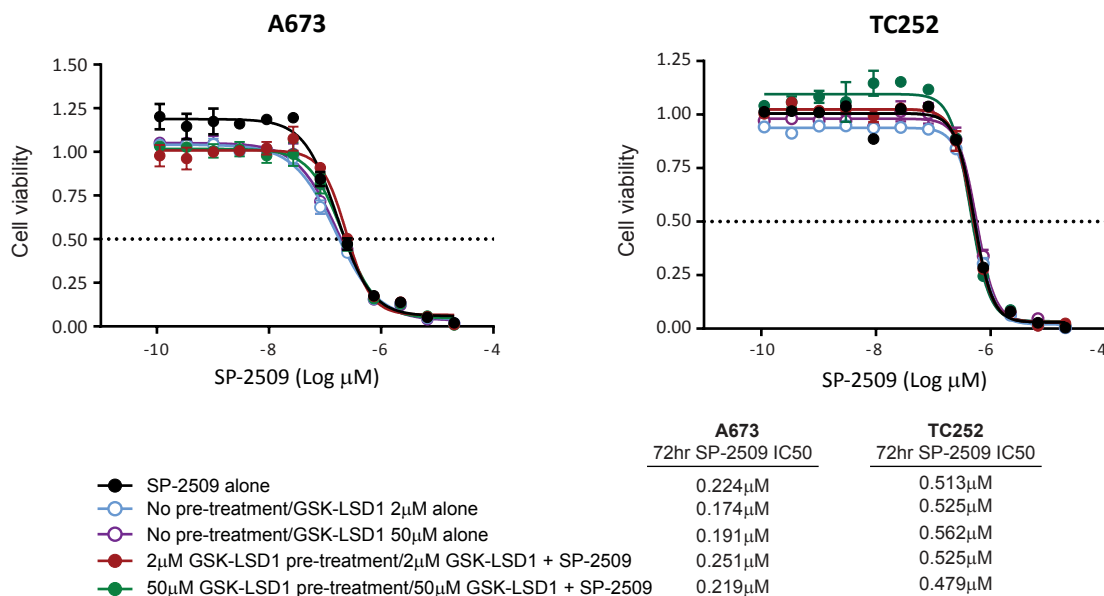

**E**

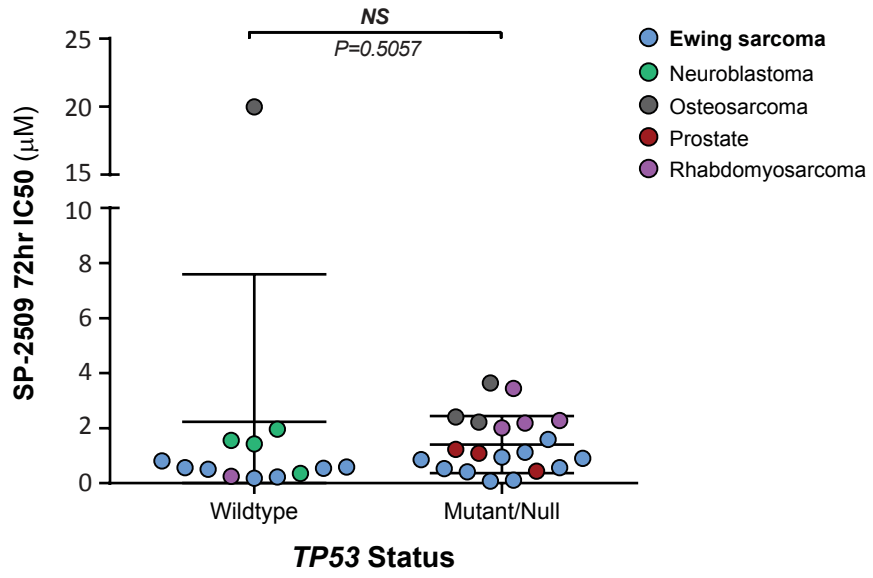

**F**

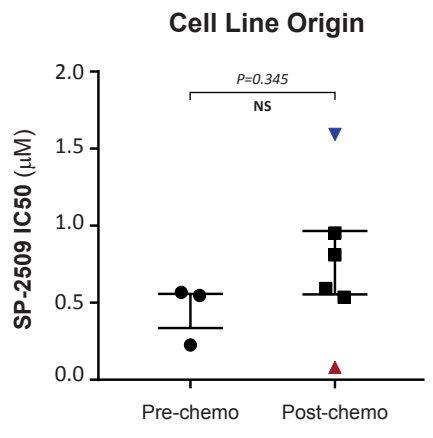

**G**

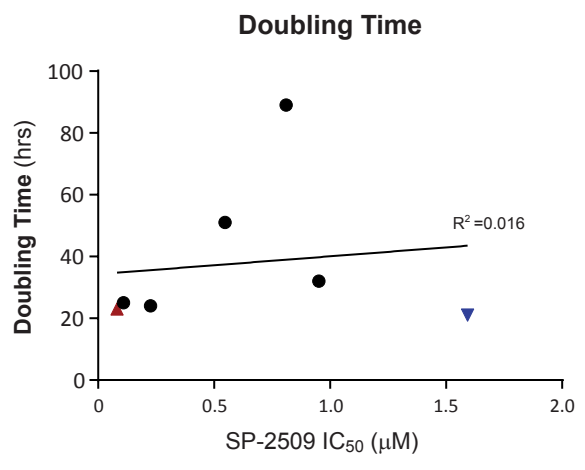

**H**

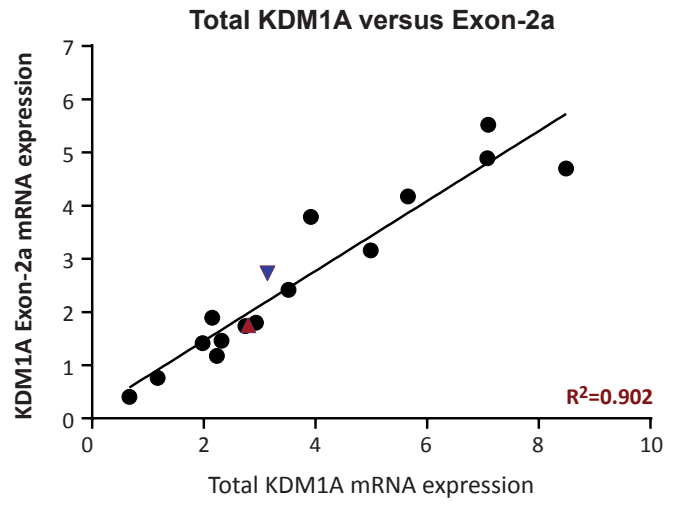

I

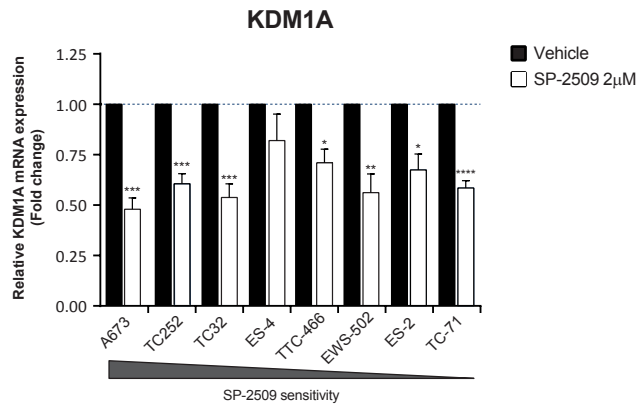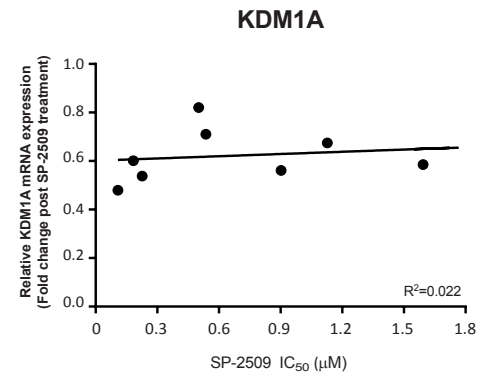

J

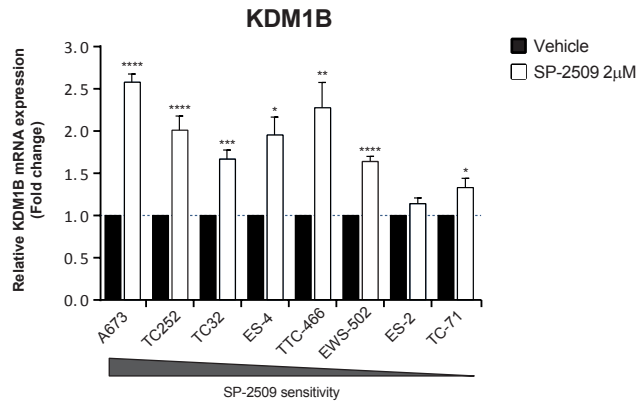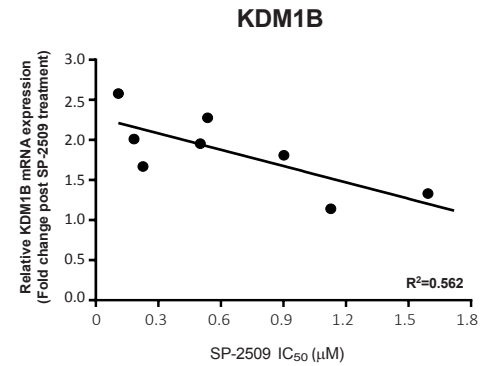

K

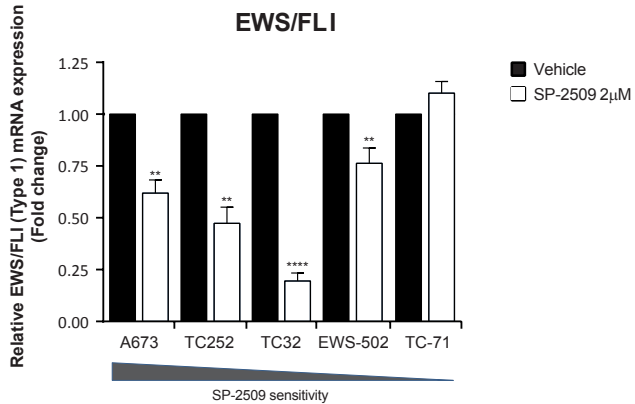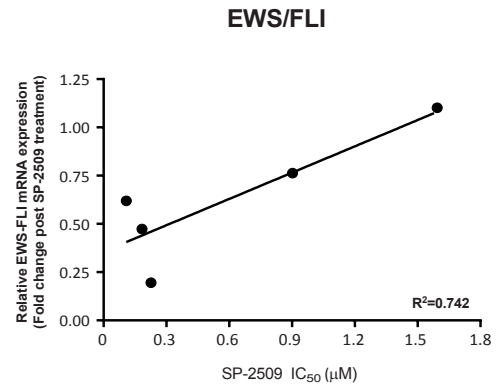

L

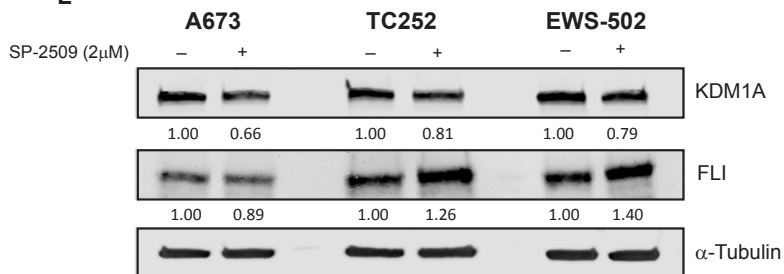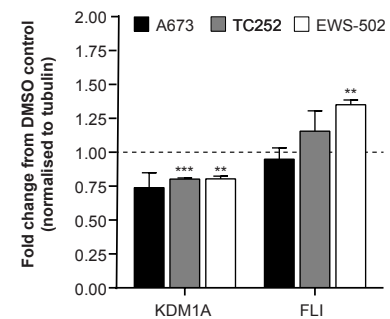

**Supplementary Figure S3: Cytotoxic effects of the irreversible KDM1A inhibitors GSK-LSD1 and Tranylcypromine in Ewing sarcoma cell lines**

**(A)** Sensitivity of Ewing (n=17), Neuroblastoma (n=4), Prostate (n=5), Rhabdomyosarcoma (n=5) and Osteosarcoma (n=4) cell lines to SP-2509. Cell viability determined through Cell Titer Glo (CTG) analysis 72hrs post treatment. Data represents mean  $\pm$  SEM from three independent experiments. Neuroblastoma and Prostate IC<sub>50</sub> data taken from Gupta et al., 2016 and 2018. **(B)** Ewing sarcoma cell lines were treated with escalating concentrations of either Tranylcypromine or GSK-LSD1, with cell viability determined through CTG assays 72 and 144hrs post treatment respectively. Data represents mean  $\pm$  STDEV from two independent experiments (GSK-LSD1) or mean  $\pm$  SEM from three independent experiments (Tranylcypromine). **(C)** Whole cell and nuclear uptake of [<sup>3</sup>H] GSK-LSD1 in A673/TC252 (Ewing sarcoma), HL-60 (AML) and H1417 (SCLC) cell lines following 5min and 2hr incubation with tritiated compound. **(D)** A673 and TC252 cells were treated with either GSK-LSD1 (2 $\mu$ M or 50 $\mu$ M) or DMSO for 48hrs prior to treatment with SP-2509 alone or in combination with GSK-LSD1 for an additional 72hrs. Cell viability determined through CTG analysis. Data represents mean viability  $\pm$  SEM from triplicate reactions. Lack of correlation between **(E)** TP53 status, **(F)** cell line origin (pre or post-chemotherapy treatment), and **(G)** cell line doubling time with SP-2509 sensitivity. Doubling time taken from May et al., 2013. **(H)** Correlation between total and Exon-2a specific KDM1A mRNA expression levels in our Ewing sarcoma cell line cohort (n=17). KDM1A mRNA levels (fold change) normalized to IMR90 cells. Data represents mean  $\pm$  STDEV from two independent experiments.  $\blacktriangle$  $\blacktriangledown$  Denotes most and least SP-2509 sensitive cell line (SK-N-MC and TC-71) respectively. Relative mRNA expression levels of **(I)** KDM1A, **(J)** KDM1B and **(K)** EWS/FLI in Ewing sarcoma cell lines following treatment with vehicle control (DMSO) or SP-2509 (2 $\mu$ M) for 48hrs. Data represents mean expression  $\pm$  SEM from three independent experiments. Cell lines are ranked in order of SP-2509 sensitivity (IC<sub>50</sub>). Correlation between KDM1A, KDM1B and EWS/FLI (Type 1) mRNA levels post SP-2509 treatment and SP-2509 sensitivity (IC<sub>50</sub>) are also shown. **(L)** Western blot analysis of KDM1A and FLI protein levels in A673, TC252 and EWS-502 cells treated as in **(I)**. Quantification of protein levels (densitometry) following SP-2509 treatment (48hrs). Protein normalized to  $\alpha$ -tubulin (loading control) and vehicle (DMSO) control. Data represents mean  $\pm$  STDEV from two independent experiments. Asterisks denote statistical significance (\* $P$  < 0.05, \*\* $P$  < 0.01, \*\*\* $P$  < 0.001, \*\*\*\* $P$  < 0.0001).
