# Supplementary material
Source: PubMed Central journal article supplement (PMC6201274)
Supplement: NIHMS980544-supplement-4.pdf [file NIHMS980544-supplement-4.pdf]

**A**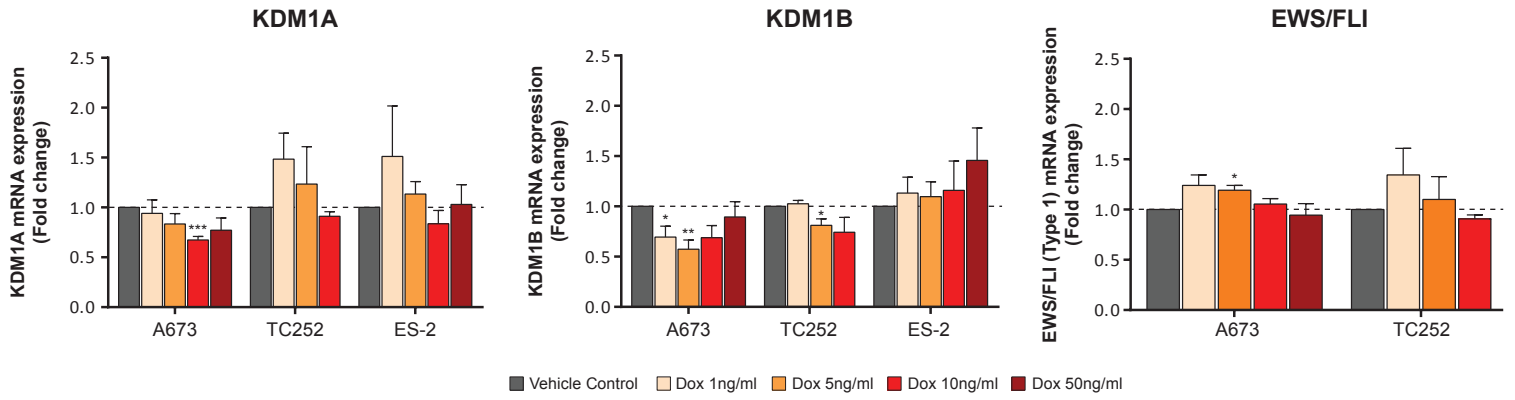**B**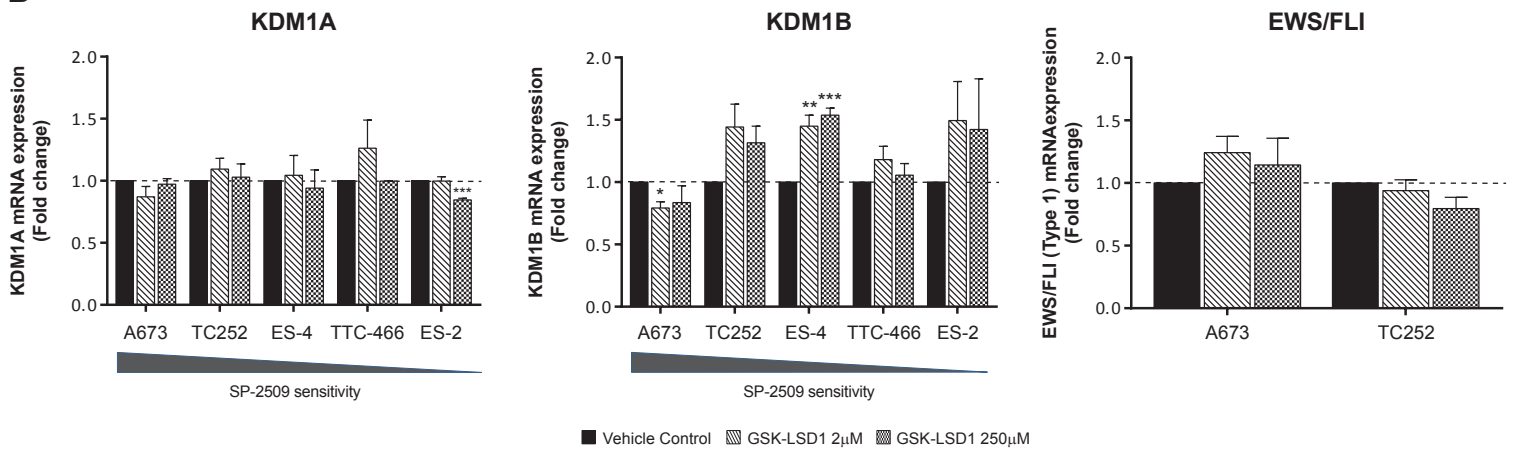

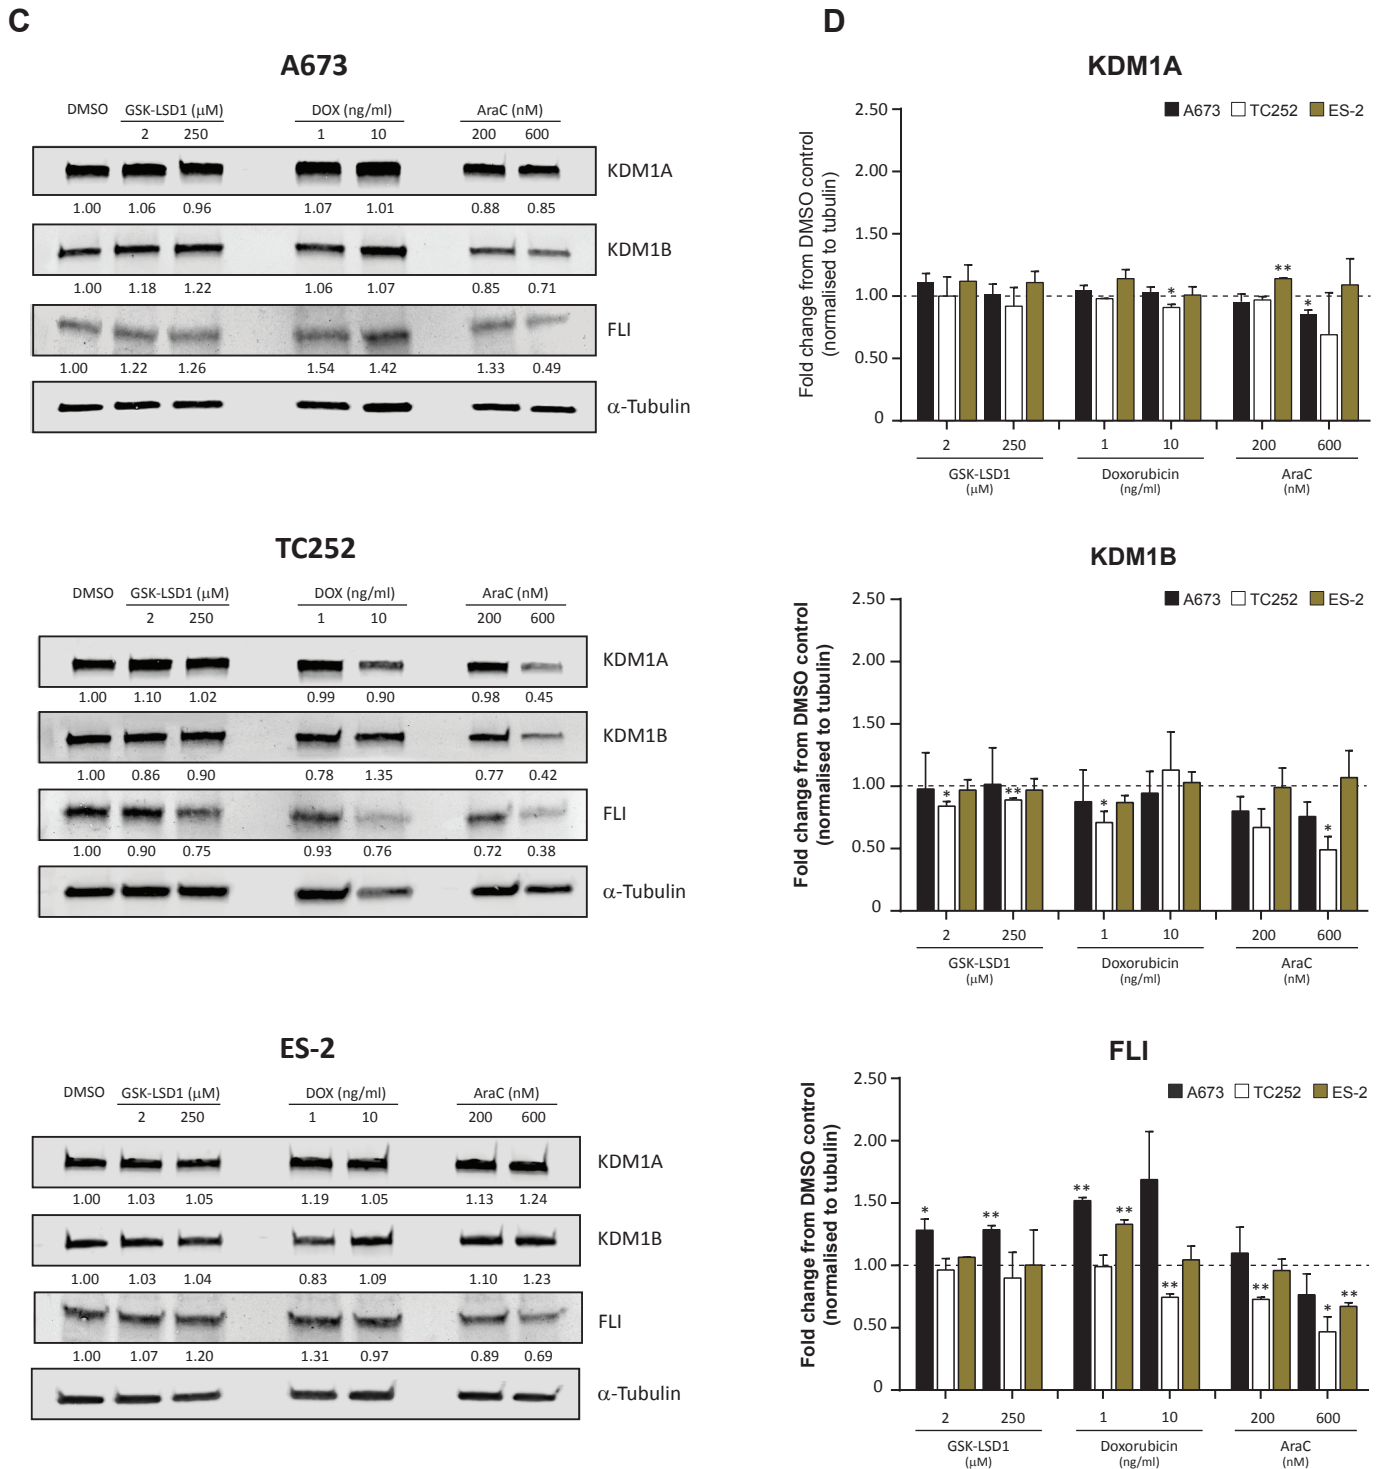

**Supplementary Figure S4: Doxorubicin and GSK-LSD1 have no effect on KDM1A mRNA and protein levels.**

Relative mRNA expression levels of KDM1A, KDM1B and EWS/FLI (Type 1) following treatment with the indicated concentrations of (A) doxorubicin or (B) GSK-LSD1 for 48hrs. Data represents mean  $\pm$  SEM expression from three-five independent experiments. (C) Western blot analysis of KDM1A, KDM1B and FLI protein levels in A673, TC252 and ES-2 Ewing sarcoma cells following treatment with the indicated concentrations of GSK-LSD1, doxorubicin or AraC for 48hrs. (D) Quantification of protein levels (densitometry) of cells treated as in (C). Protein normalized to  $\alpha$ -Tubulin (loading control) and vehicle (DMSO) control. Data represents mean  $\pm$  STDEV from two independent experiments. Cell lines are ranked in order of SP-2509 sensitivity. Asterisks denote statistical significance (\* $P$ <0.05, \*\* $P$ <0.01, \*\*\* $P$ <0.001).
